# Supplementary material
Source: PubMed Central journal article supplement (PMC4610024)
Supplement: NIHMS725572-supplement-Supplemental_Material.pdf [file NIHMS725572-supplement-Supplemental_Material.pdf]

# Supp Figure S1

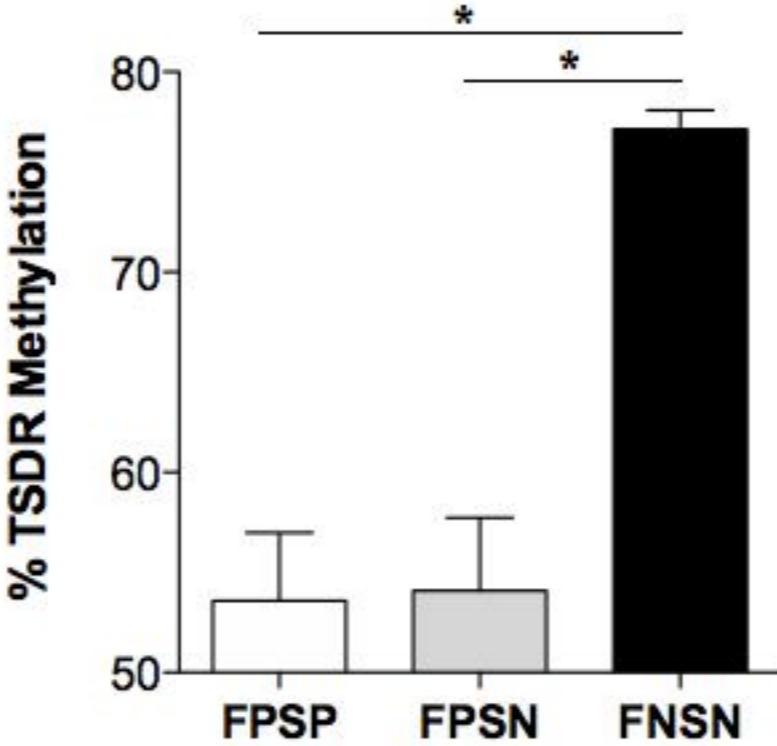

**Figure S1. FPSP and FPSN clones have equally demethylated TSDR regions.** Genomic DNA was extracted from female-derived primary FPSP, FPSN and FNSN clones and analyzed for TSDR methylation. Shown is the mean + SEM of % methylation of 10 cytosine guanine dinucleotides (CpGs) of the human Treg specific demethylation region (TSDR). n= 2-4 clones per group. Statistical analysis was done with the one-way ANOVA followed by Tukey's post-test.

# Supp Figure S2

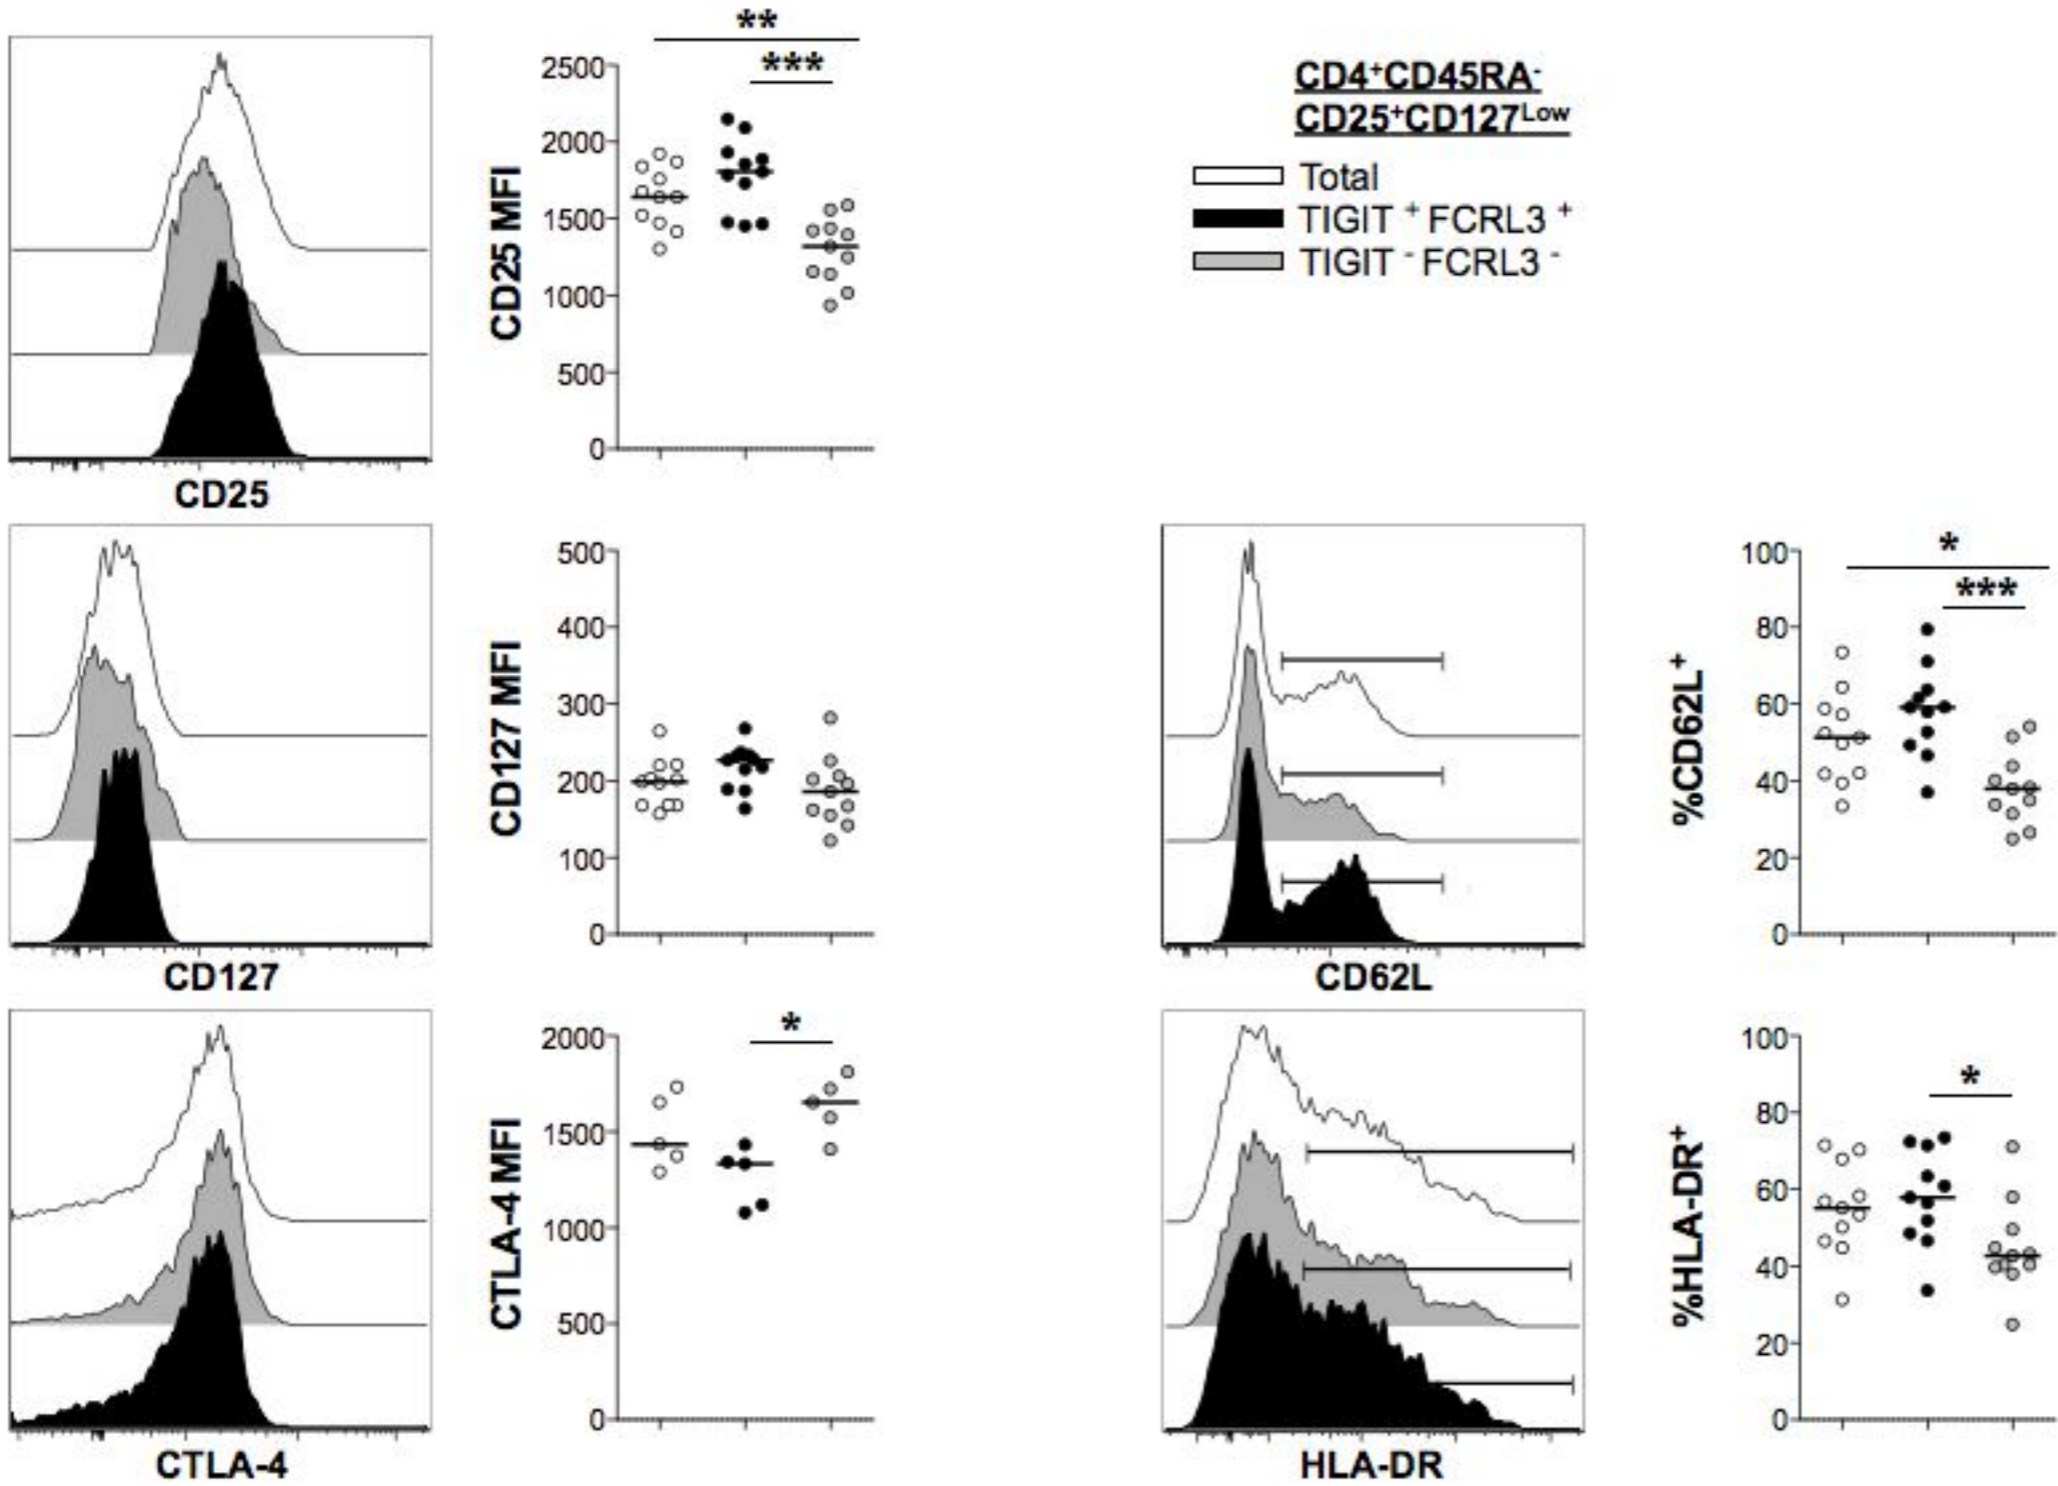

Figure S2. Analysis of the expression of Treg-associated molecules on TIGIT<sup>+</sup>FCRL3<sup>+</sup> vs. TIGIT<sup>-</sup>FCRL3<sup>-</sup> Treg cells. PBMCs from healthy subjects were analyzed *ex vivo* by flow cytometry. Shown are representative FACS plots as well as the combined analysis of marker expression on Treg subsets of 11 healthy donors. Statistical analysis was done with the one-way ANOVA followed by Tukey's post-test

# Supp Figure S3

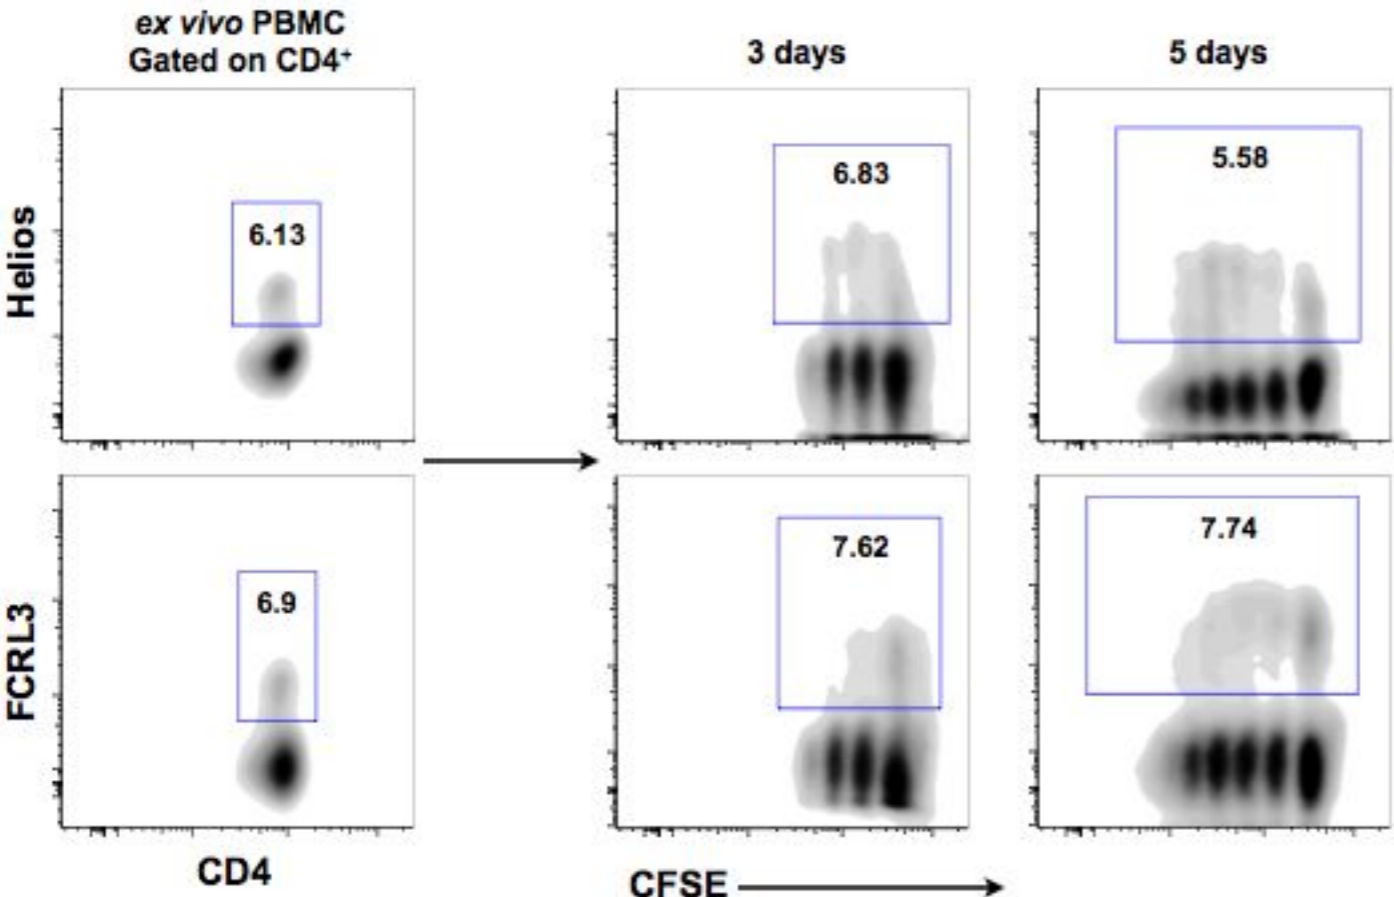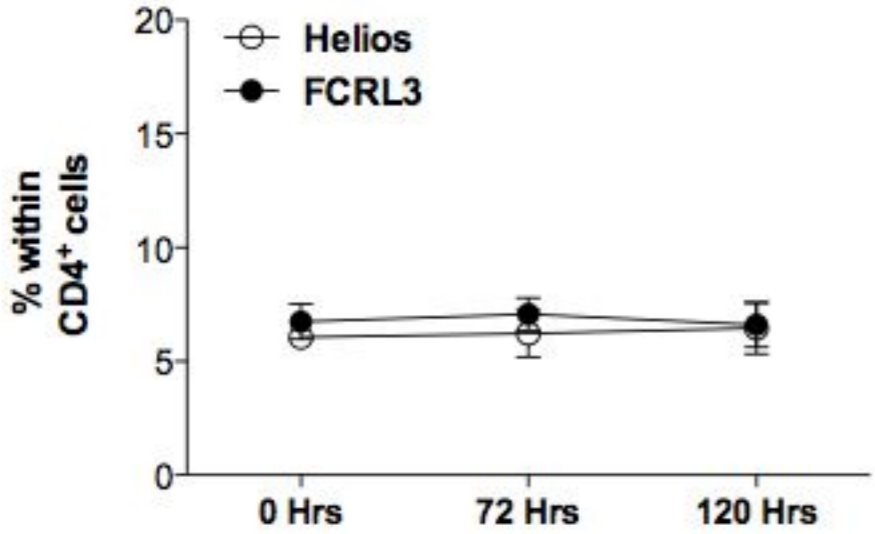

Figure S3. Helios and FCRL3 are not induced on Tconv upon *in vitro* activation of PBMC. Whole PBMC from 3 healthy individuals were labeled with CFSE and stimulated with anti-CD3/anti-CD28-coated beads at a ratio of 2 beads: 1 cell for 5 days. Shown is the expression of Helios and FCRL3 on CD4<sup>+</sup> cells at day 0, 3 and 5.



Supp Figure S4

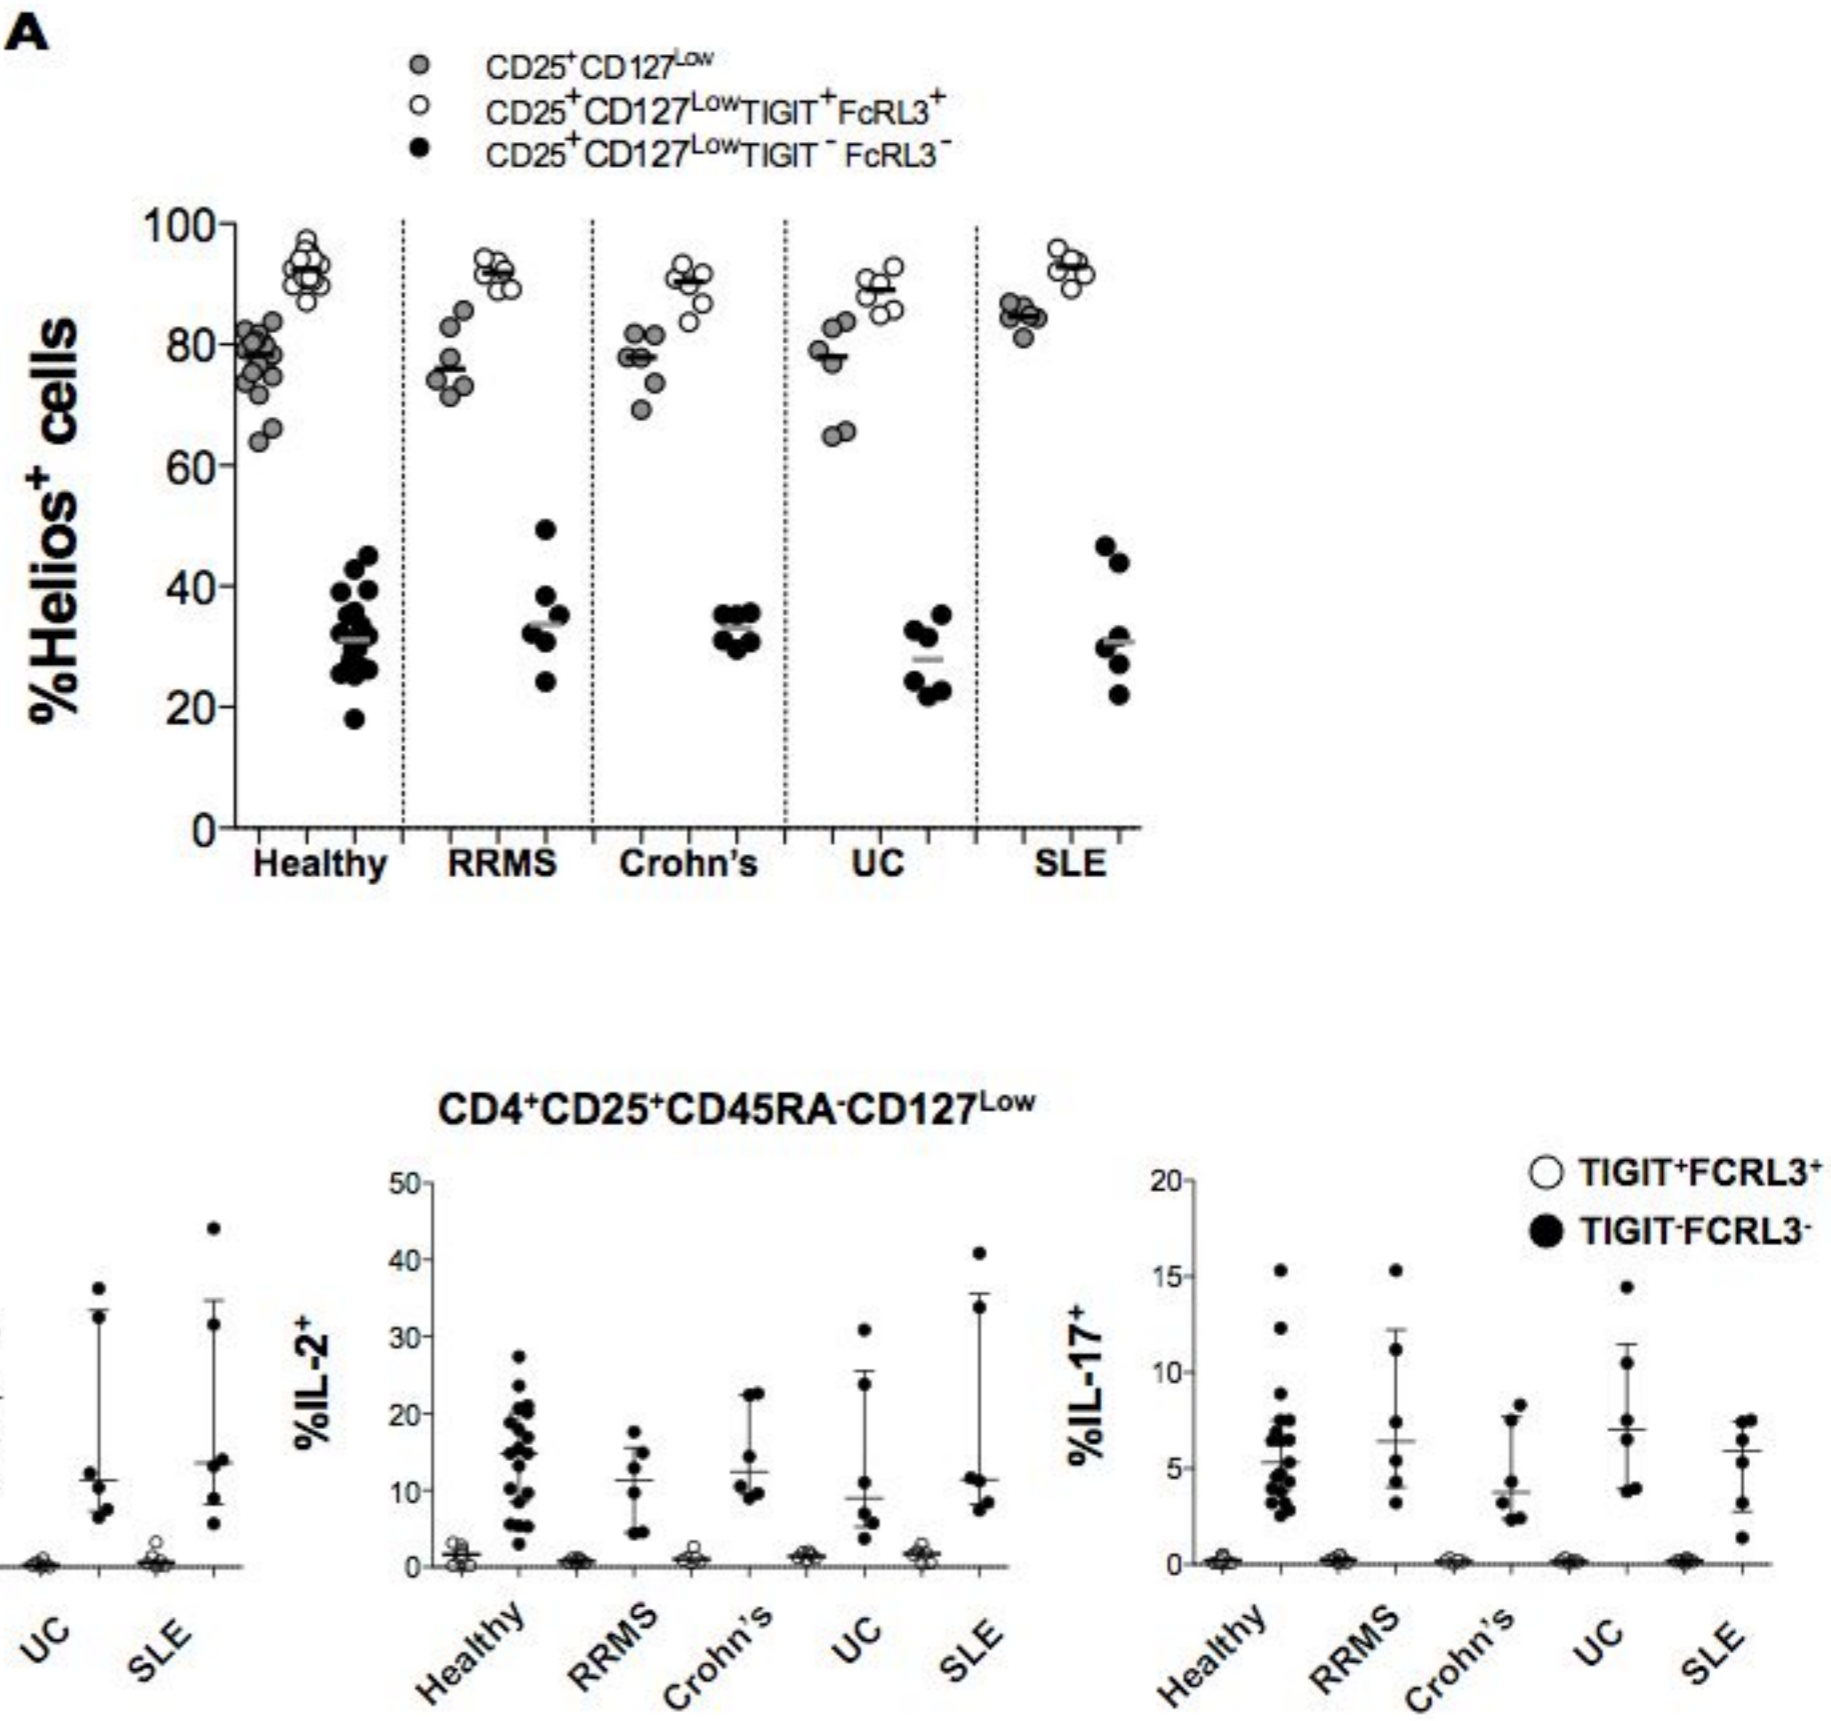

**Figure S4. Phenotype and cytokine production in TIGIT<sup>+</sup>FCRL3<sup>+</sup> vs. TIGIT<sup>-</sup>FCRL3<sup>-</sup> Treg cells of healthy and autoimmune donors.** PBMCs from untreated patients with relapsing-remitting multiple sclerosis (n=6), Crohn's disease (n=6), ulcerative colitis (n=6), and treated systemic lupus erythematosus (n=6; SLEDAI-2k >6) and their age and sex-matched healthy controls (n=19) were analyzed by flow cytometry directly *ex vivo* (A) or after incubation with PMA (25 ng/ml), ionomycin (1 μg/ml) and GolgiStop for 4hrs (B). Shown is A) the percentage of Helios-expressing cells in TIGIT/FCRL3-identified Treg subsets, and B) the frequency of cytokine-producing cells in the indicated subsets.
